# Supplementary material
Source: PubMed Central journal article supplement (PMC7274747)
Supplement: NIHMS1590354-supplement-Supporting_Information.pdf [file NIHMS1590354-supplement-Supporting_Information.pdf]

---

# Learning to Optimize in Swarms

## (Supporting Information)

---

Yue Cao, Tianlong Chen, Zhangyang Wang, Yang Shen

Departments of Electrical and Computer Engineering & Computer Science and Engineering  
Texas A&M University, College Station, TX 77840  
{cyppsp, wiwjp619, atlaswang, yshen}@tamu.edu

## 1 Supplemental Results

### 1.1 Learn to optimize convex quadratic functions

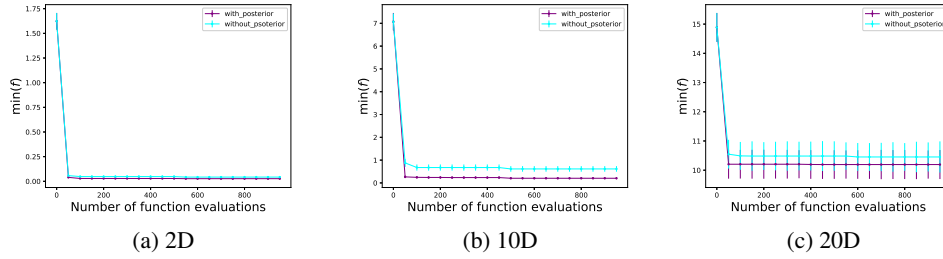

Figure S1: The performance of our meta-optimizer for convex quadratic functions, with or without the posterior term in meta loss.

### 1.2 Transferability: Learning to optimize non-convex Rastrigin functions from convex optimization

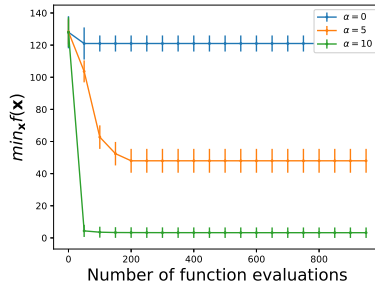

Figure S2: Optimization performance for the 10D Rastrigin function ( $\alpha = 10$ ) when the meta-optimizer is trained using Rastrigin family with increasing  $\alpha$  (thus increasing ruggedness).  $\alpha = 0$  corresponds to convex training functions.

## 2 Training Examples for Protein Docking

| Difficulty level | Protein Data Bank (PDB) code                                                                                                          |
|------------------|---------------------------------------------------------------------------------------------------------------------------------------|
| Rigid            | 1N8O , 7CEI , 1DFJ , 1AVX , 1BVN , 1IQD , 1CGI , 1MAH , 1EZU ,<br>1JPS , 1PPE , 1R0R , 2I25 , 2B42 , 1EAW , 2JEL , 1BJ1 , 1KXQ , 1EWY |
| Medium           | 1XQS, 1M10, 1IJK, 1GRN                                                                                                                |
| Flexible         | 1IBR, 1ATN                                                                                                                            |

Table S1: 4-letter ID of proteins used in the training set.
